# Supplementary material for: Effects of IL-11/IL-11 Receptor Alpha on Proliferation and Steroidogenesis in Ovarian Granulosa Cells of Dairy Cows
Source: MDPI journal article supplement (doi:10.3390/cells12040673), 2023-02-20
Supplement: s1 [file s1]

Table S2 Sequences of primers for qRT-PCR

| Genes                            | Sequence (5'-3')                                | Length (bp) | Accession no.                  |
|----------------------------------|-------------------------------------------------|-------------|--------------------------------|
| <i>GAPDH</i>                     | GGTCACCAGGGCTGCTTTTA<br>CCAGCATCACCCCACTTGAT    | 222         | <a href="#">NM_001034034.2</a> |
| <i>IL-11R<math>\alpha</math></i> | GGCTCTGGCTAAGGTTGAG<br>TGTCCTGCCTGGGTTCTA       | 183         | <a href="#">NM_001034339.1</a> |
| <i>IL-11</i>                     | ATGAACAGTGTTTGCTGCCTG<br>CTCCGTCAGCTGGGAATTTG   | 205         | <a href="#">XM_024979371.1</a> |
| <i>BAX</i>                       | TCACCGCCTCGCTCACCATC<br>CCCCCAAGACCACACCTCCC    | 178         | <a href="#">NM_173894.1</a>    |
| <i>BCL-2</i>                     | TTCAGCATCACGGAGGAGGTA<br>TCTTCAATCACGCGGAACACT  | 144         | <a href="#">NM_001166486.1</a> |
| <i>PCNA</i>                      | GAACCTCACCAGCATGTCCAA<br>TTCACCAGAAGGCATCTTTACT | 220         | <a href="#">NM_001034494.1</a> |
| <i>CCND1</i>                     | CCGTCCATGCGGAAGATC<br>CAGGAAGCGGTCCAGGTAG       | 108         | <a href="#">NM_001046273.2</a> |
| <i>CCNB1</i>                     | GGAAGTTTTGTGTTTTGTGG<br>AGTGGTGGTGATAGAGGAGG    | 244         | <a href="#">NM_001045872.1</a> |
| <i>CYP19A1</i>                   | ATCGGCATGCACGAGAAAGG<br>CAACACGTCCACATAGCCCA    | 192         | <a href="#">NM_174305.1</a>    |
| <i>CYP11A1</i>                   | TCCAGAACTGTACCGTCTATT<br>GCCTGGGTAATTCCTAAA     | 145         | <a href="#">NM_176644.2</a>    |
| <i>StAR</i>                      | TGATCCCTGACGTGGGC<br>TGAGTGATGACCGTGTCTTTT      | 169         | <a href="#">NM_174189.3</a>    |
| <i>HSD3B</i>                     | CTTGCCGAGAAGGCTGTG<br>TGGTCAGGATGCCGTTG         | 160         | <a href="#">NM_174343.3</a>    |
