# Supplementary material for: Effects of IL-11/IL-11 Receptor Alpha on Proliferation and Steroidogenesis in Ovarian Granulosa Cells of Dairy Cows
Source: MDPI journal article supplement (doi:10.3390/cells12040673), 2023-02-20
Supplement: s1 [file s1]

Table S1 Antibodies used in this study

| Antibodies                     | Dilution ratio                          | Supplier            | RRID                        | Cat. No    | MW (KD) |
|--------------------------------|-----------------------------------------|---------------------|-----------------------------|------------|---------|
| IL-11R $\alpha$                | 1:1000 <sup>1</sup> /1:100 <sup>3</sup> | Affinity, USA       | <a href="#">AB_2837056</a>  | DF4705     | 45      |
| IL-11R $\alpha$                | 1:200 <sup>2</sup>                      | ABclonal, China     | <a href="#">AB_2921269</a>  | A9365      |         |
| IL-11                          | 1:200 <sup>2</sup> /1:100 <sup>3</sup>  | ABclonal, China     | <a href="#">AB_2763933</a>  | A1902      |         |
| gp130                          | 1:200 <sup>2</sup>                      | ABclonal, China     | <a href="#">AB_2861832</a>  | A18036     |         |
| FSHR                           | 1:200 <sup>2</sup>                      | ABclonal, China     | <a href="#">AB_2761677</a>  | A1480      |         |
| CYP17A1                        | 1:200 <sup>2</sup>                      | Bioss, China        | <a href="#">AB_10855146</a> | bs-3853R   |         |
| BAX                            | 1:1000 <sup>1</sup>                     | Affinity, USA       | <a href="#">AB_2833304</a>  | AF0120     | 21      |
| PCNA                           | 1:1000 <sup>1</sup>                     | Proteintech, USA    | <a href="#">AB_2160330</a>  | 10205-2-AP | 36-38   |
| CyclinD1                       | 1:1000 <sup>1</sup>                     | Proteintech, USA    | <a href="#">AB_10793718</a> | 60186-1-Ig | 34      |
| StAR                           | 1:1000 <sup>1</sup>                     | ABclonal, China     | <a href="#">AB_2772418</a>  | A16432     | 28      |
| CYP19A1                        | 1:500 <sup>1</sup>                      | Cell Signaling, USA | <a href="#">AB_2630344</a>  | 14528s     | 50      |
| CREB                           | 1:1000 <sup>1</sup>                     | Cell Signaling, USA | <a href="#">AB_331277</a>   | 9197s      | 43      |
| Phospho-CREB (Ser133)          | 1:1000 <sup>1</sup>                     | Cell Signaling, USA | <a href="#">AB_2561044</a>  | 9198s      | 43      |
| JAK1                           | 1:1000 <sup>1</sup>                     | Cell Signaling, USA | <a href="#">AB_2128499</a>  | 3332s      | 130     |
| Phospho-JAK1<br>(Tyr1034/1035) | 1:1000 <sup>1</sup>                     | Cell Signaling, USA | <a href="#">AB_2265057</a>  | 3331s      | 130     |
| JAK2                           | 1:1000 <sup>1</sup>                     | Cell Signaling, USA | <a href="#">AB_10691469</a> | 4040s      | 125     |
| Phospho-JAK2<br>(Tyr1007/1008) | 1:1000 <sup>1</sup>                     | Cell Signaling, USA | <a href="#">AB_330403</a>   | 3771s      | 125     |

|                                    |                     |                     |                             |          |                       |
|------------------------------------|---------------------|---------------------|-----------------------------|----------|-----------------------|
| STAT3                              | 1:1000 <sup>1</sup> | Cell Signaling, USA | <a href="#">AB_2629499</a>  | 12640s   | 79,86                 |
| Phospho-STAT3 (Tyr705)             | 1:1000 <sup>1</sup> | Cell Signaling, USA | <a href="#">AB_2491009</a>  | 9145s    | 79,86                 |
| mTOR                               | 1:1000 <sup>1</sup> | Cell Signaling, USA | <a href="#">AB_2105622</a>  | 2983T    | 289                   |
| Phospho-mTOR<br>(Ser2448)          | 1:1000 <sup>1</sup> | Abcam, UK           | <a href="#">AB_10888105</a> | ab109268 | 289                   |
| p44/42 MAPK (ERK1/2)               | 1:1000 <sup>1</sup> | Cell Signaling, USA | <a href="#">AB_390779</a>   | 4695s    | 42,44                 |
| Phospho-ERK1/2<br>(Thr202/Tyr204)  | 1:1000 <sup>1</sup> | Cell Signaling, USA | <a href="#">AB_2315112</a>  | 4370s    | 42,44                 |
| Phospho-PKA Substrates             | 1:1000 <sup>1</sup> | Cell Signaling, USA | <a href="#">AB_331817</a>   | 9624s    |                       |
| p38 MAPK                           | 1:1000 <sup>1</sup> | Affinity, USA       | <a href="#">AB_2835277</a>  | AF6456   | 43;<br>41(Calculated) |
| Phospho-p38MAPK<br>(Thr180/Tyr182) | 1:1000 <sup>1</sup> | Affinity, USA       | <a href="#">AB_2835330</a>  | AF4001   | 43;<br>41(Calculated) |
| GAPDH                              | 1:5000 <sup>1</sup> | ABclonal, China     | <a href="#">AB_2736879</a>  | AC002    | 36                    |
| HRP Goat Anti-Mouse<br>IgG (H+L)   | 1:8000 <sup>1</sup> | ABclonal, China     | <a href="#">AB_2769851</a>  | AS003    |                       |
| HRP Goat Anti-Rabbit<br>IgG (H+L)  | 1:8000 <sup>1</sup> | ABclonal, China     | <a href="#">AB_2769854</a>  | AS014    |                       |
| FITC Goat Anti-Rabbit<br>IgG (H+L) | 1:200 <sup>2</sup>  | ABclonal, China     | <a href="#">AB_2769476</a>  | AS011    |                       |
| Cy3 Goat Anti-Rabbit<br>IgG (H+L)  | 1:200 <sup>2</sup>  | ABclonal, China     | <a href="#">AB_2769089</a>  | AS007    |                       |
| HRP Goat Anti-Rabbit<br>IgG (H+L)  | 1:200 <sup>3</sup>  | Servicebio, China   | <a href="#">AB_2892100</a>  | G1213    |                       |

---

<sup>1</sup>Dilution used for Western blotting.

<sup>2</sup>Dilution used for Immunofluorescence.

<sup>3</sup>Dilution used for Immunohistochemistry.
